# Supplementary material for: Effects of Genetic Variation in the Human Retinol Binding Protein-4 Gene (RBP4) on Insulin Resistance and Fat Depot–Specific mRNA Expression
Source: Oxford University Press journal article supplement (doi:10.2337/db06-1647), 2007-08-30
Supplement: db061647onlinesuppfigandtab.doc [file db061647onlinesuppfigandtab.doc]

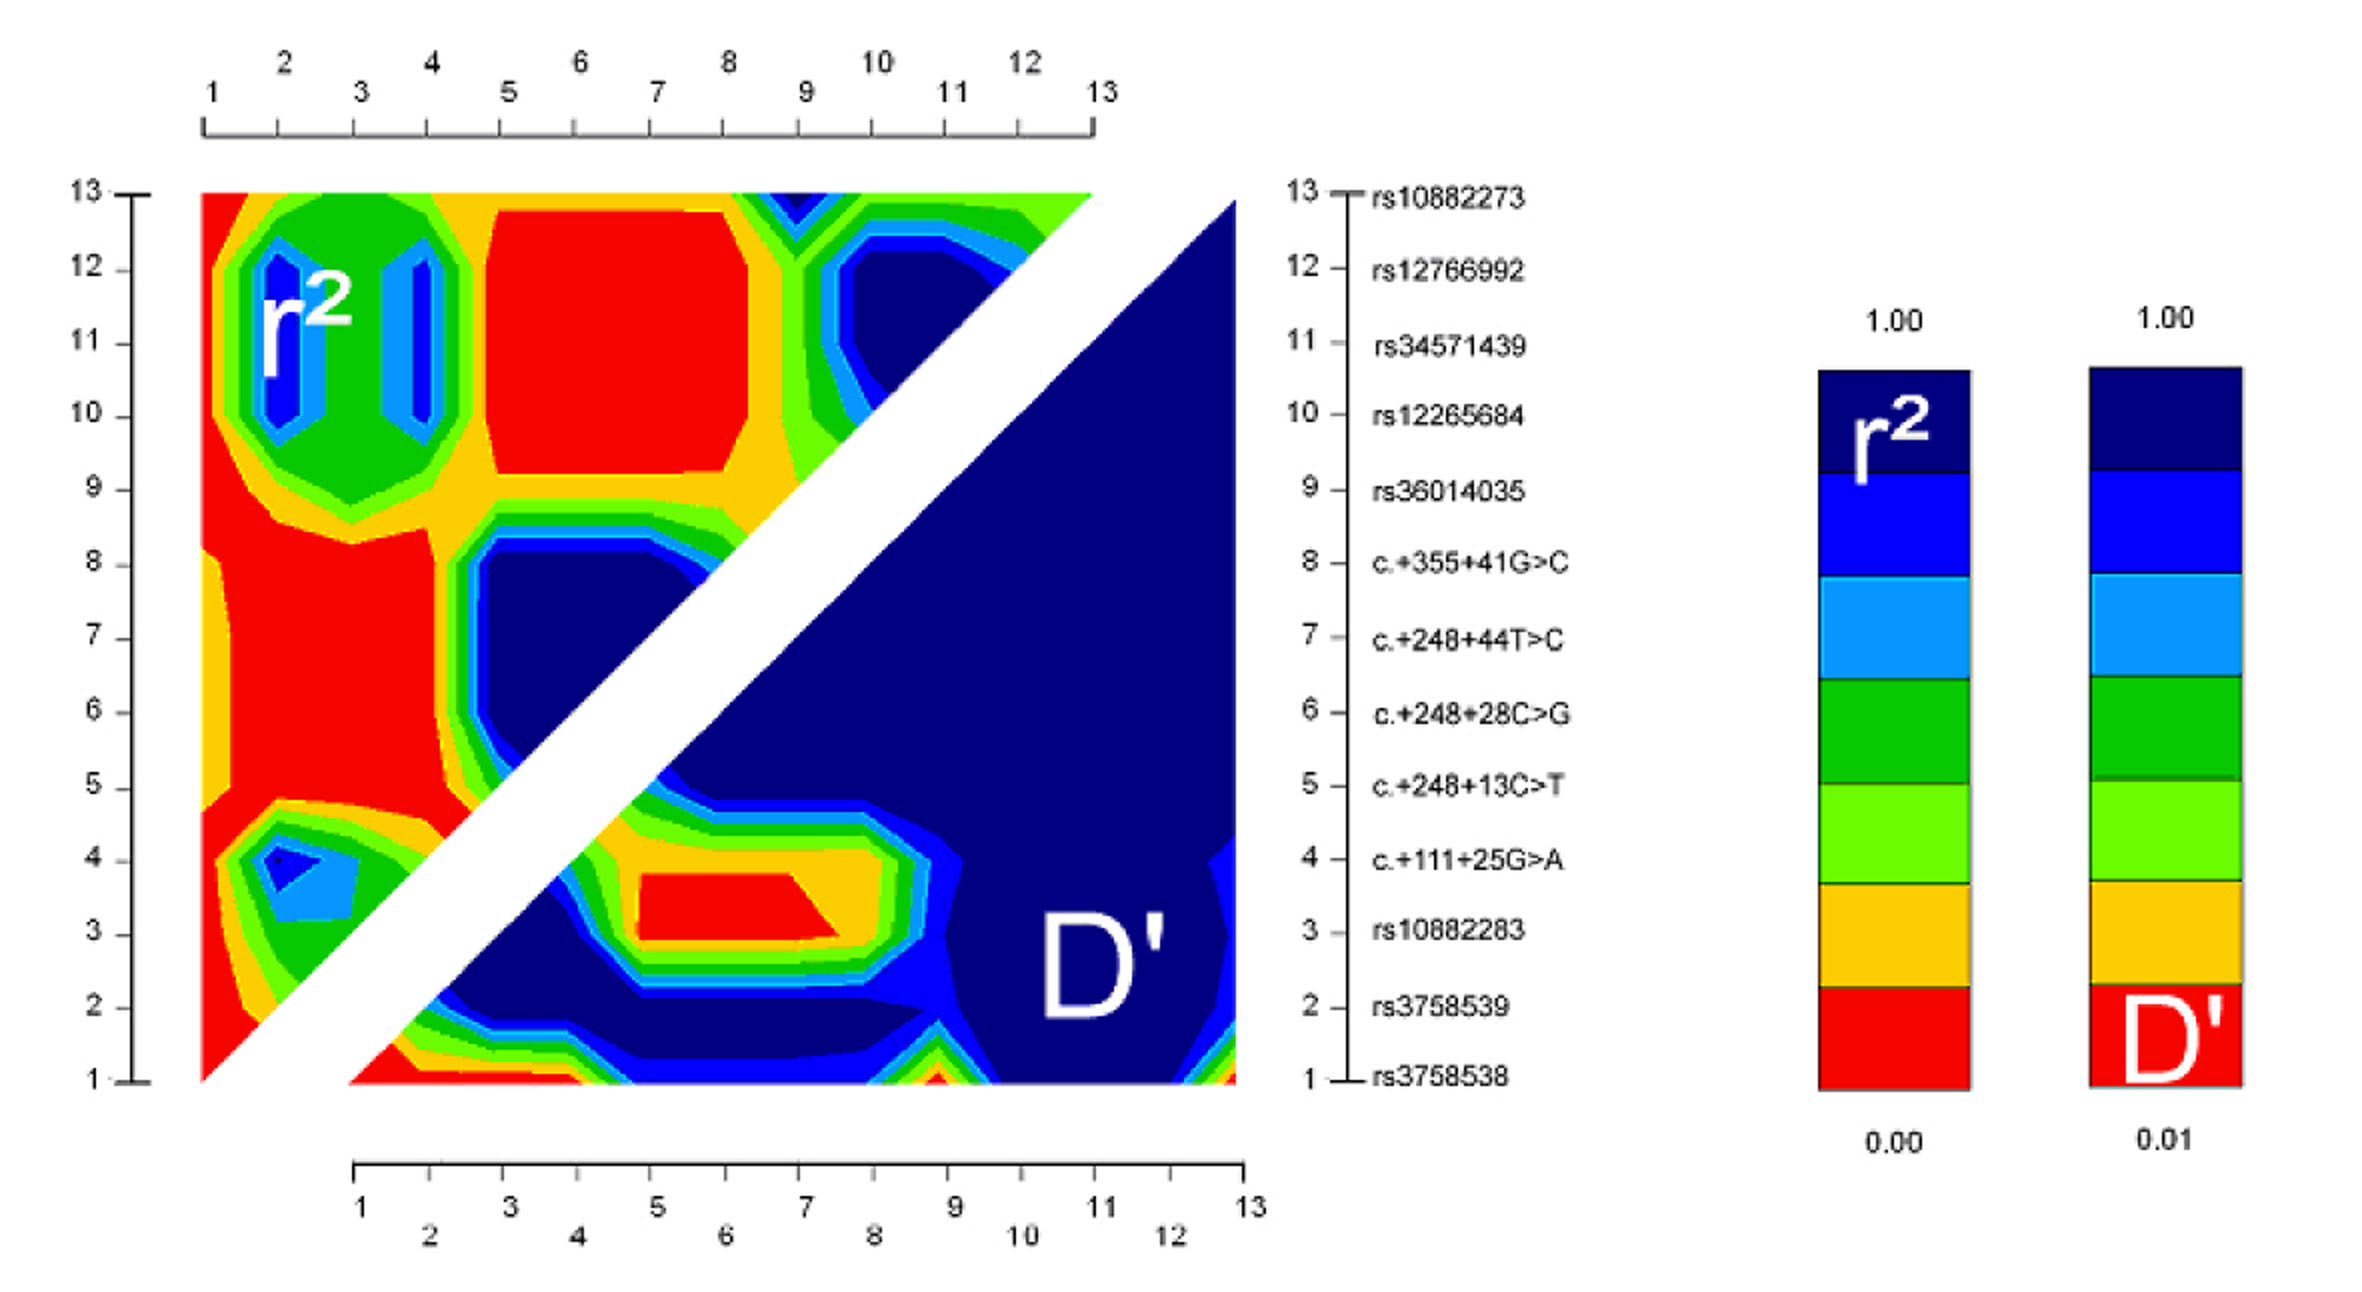


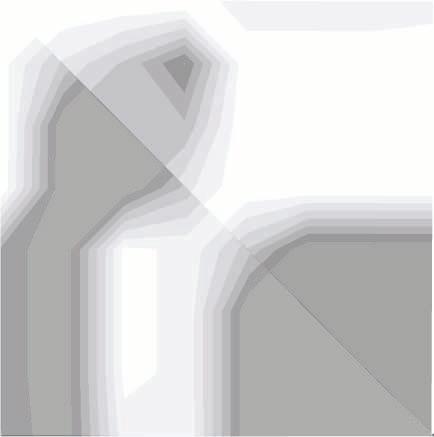


**Online Supplement - Figure 1: Measures of L.D. (D prime (D’) and r2) among *RBP4* SNPs**

**Online Supplement - Table 1: Association of *RBP4*** genetic variants with type 2 diabetes.

|  | **Genotype** | **Subjects with Type 2 Diabetes** | **Subjects without Type 2 Diabetes** | **Additive** |
| --- | --- | --- | --- | --- |
|  | ***P-value*** |
|  | **OR ( 95% CI )** |
| **N** |  | 934 | 537 |  |
| **Sex (m/f)** |  | 477/457 | 205/332 |  |
| **Age (years)** |  | 64±0.4 | 46±0.7 |  |
| **BMI (kg/m²)** |  | 29.2 (28.9 - 29.5) | 26.1 (25.7 - 26.4) |  |
|  |  |  |  |  |
|  |  | **Frequency** | **Frequency** |  |
| **rs3758538** | A/A | 74.5% | 73.8% | 0.42 |
|  | A/C | 24.2% | 24.2% | 0.88 (0.66 – 1.19) |
|  | C/C | 1.3% | 2.0% |  |
| **rs3758539** | G/G | 70.5% | 64.2% | 0.18 |
|  | G/A | 26.4% | 31.7% | 0.86 (0.69 – 1.07) |
|  | A/A | 3.1% | 4.2% |  |
| **rs10882283** | T/T | 52.0% | 46.8% | 0.31 |
|  | T/G | 36.2% | 40.9% | 0.89 (0.71 – 1.11) |
|  | G/G | 11.8% | 12.3% |  |
| **c.248+44T>C** | T/T | 86.7% | 85.1% | 0.24 |
|  | T/C | 13.0% | 14.3% | 0.79 (0.53 – 1.17) |
|  | C/C | 0.3% | 0.6% |  |
| **rs12265684** | G/G | 69.8% | 63.8% | 0.22 |
|  | G/C | 27.0% | 32.4% | 0.85 (0.65 – 1.10) |
|  | C/C | 3.2% | 3.8% |  |
| **rs10882273** | T/T | 40.9% | 38.8% | 0.37 |
|  | T/C | 46.5% | 48.9% | 1.11 (0.89 – 1.38) |
|  | C/C | 12.7% | 12.3% |  |

OR (95 % CI) means odds ratio with 95% confidence intervals. *P* values were calculated after adjusting for age, sex and BMI under logistic regression analysis. In the additive model, homozygotes for the major allele (MM), heterozygotes (Mm) and homozygotes for the minor allele (mm) were coded to a continuous numeric variable for genotype (as 0, 1, 2).

**Online Supplement - Table 2: Serum RBP4 and *RBP4* mRNA levels of non-diabetic subjects grouped by *RBP4*** variant genotypes.

| **Genotype** | **rs3758538** | | | **rs3758539** | | | **rs10882283** | | | **c.248+44T>C** | | |
| --- | --- | --- | --- | --- | --- | --- | --- | --- | --- | --- | --- | --- |
|  | **A/A** | **A/C** | | **G/G** | **G/A** | | **T/T** | **T/G** | **G/G** | **T/T** | **T/C** | |
|  |  |  | |  |  | |  |  |  |  |  | |
| N | 126 | 44 | | 110 | 60 | | 79 | 68 | 23 | 145 | 25 | |
| Sex (M/F) | 59/67 | 22/22 | | 53/57 | 30/30 | | 33/36 | 36/32 | 12/11 | 72/73 | 12/13 | |
| Age (years) | 55±1.5 | 56±2.8 | | 55±1.7 | 56±2.2 | | 52±2.1 | 56±2.2 | 56±4.1 | 55±1.5 | 55±3.3 | |
| BMI (kg/m²) | 29.2  (27.9-30.5) | 30.6  (28.3-33.0) | | 29.3  (28-30.6) | 30.0  (27.9-32.3) | | 28.5  (27.0-30.1) | 30.7  (28.4-33.0) | 30.0  (26.8-33.6) | 29.6  (28.3-30.9) | 29.3  (26.9-31.8) | |
| Serum RBP4  (µg/ml) | 43.30  (38.80-48.31) | 44.14  (37.06-52.58) | | 41.66  (37.42-46.38) | 46.45  (39.25-54.97) | | 42.12  (36.94-48.04) | 42.03  (36.18-48.81) | 51.38  (40.08-65.85) | 42.97  (38.99-47.35) | 40.98  (32.06-52.38) | |
|  |  |  |  |  |  |  |  |  |  |  |  |  |
| ***RBP4* mRNA Expression** | | | | | | | | | | | | |
| Visceral fat (AU) | 1758  (1036-2986) | 2486  (1015-6088) | | 1690  (965-2957) | 2067  (935-4571) | | 1151  (552-2400) | 2072  (1000-4294) | 1552  (285-8440) | 1718  (1048-2817) | 1776  (516-6106) | |
| Subcutaneous fat (AU) | 545  (303-980) | 747  (288-1935) | | 513  (289-910) | 702  (270-1828) | | 272  (138-534) | 513  (246-1071) | 591  (90-3895) | 546  (315-948) | 570  (175-1859) | |

| **Genotype** | **rs12265684** | | | **rs10882273** | | |
| --- | --- | --- | --- | --- | --- | --- |
|  | **G/G** | **G/C** | | **T/T** | **T/C** | **C/C** |
|  |  |  | |  |  |  |
| N | 110 | 60 | | 64 | 83 | 23 |
| Sex (M/F) | 52/58 | 30/30 | | 30/34 | 38/45 | 11/12 |
| Age (years) | 55±1.7 | 56±2.1 | | 54±2.3 | 55±1.8 | 61±3.6 |
| BMI (kg/m²) | 29.2  (27.9-30.6) | 30.3  (28.1-32.5) | | 28.8  (27.1-30.6) | 30.2  (28.5-32.1) | 28.9  (26.4-31.6) |
| Serum RBP4  (µg/ml) | 41.57  (37.11-46.57) | 46.89  (40.27-54.61) | | 42.37  (36.38-49.34) | 43.71  (38.97-49.02) | 47.36  (32.23-69.6) |
|  |  |  |  |  |  |  |
| ***RBP4* mRNA Expression** | | | | | | |
| Visceral fat (AU) | 1667  (933-2981) | 2275  (1092-4741) | | 1545  (703-3395) | 2107  (1144-3882) | 2186  (482-9927) |
| Subcutaneous fat (AU) | 500  (276-906) | 798  (328-1941) | | 451  (200-1017) | 612  (301-1246) | 1029  (197-5380) |

The data are presented as arithmetic means  S.E.M. for normal variables and geometric means (95% CI) for non-normally distributed variables (serum RBP4, visceral and subcutaneous *RBP4* mRNA). *P* values were calculated in additive, dominant and recessive mode of inheritance after adjusting for age, sex, BMI and % body fat. *P*-values <0.05 were considered to be of statistical significance. Due to the small sample size, for statistical analyses only a dominant effect on risk has been tested for the rare allele of rs3758538, rs3758539, c.248+44T>C and rs12265684 for serum RBP4 and mRNA expression levels.

**Online Supplement - Table 3: Serum RBP4 and *RBP4* mRNA levels of non-diabetic subjects grouped by *RBP4*** haplotypes.

| **Haplotype** |  | **[A-G-T-T-G-T]** |  | **[A-G-G-T-G-C]** | | **[A-A-G-T-C-C]** | |
| --- | --- | --- | --- | --- | --- | --- | --- |
|  | **[A-G-T-T-G-T]/**  **[A-G-T-T-G-T]** | **[A-G-T-T-G-T]/**  **X** | **X/X** | **[A-G-G-T-G-C]/**  **X** | **X/X** | **[A-A-G-T-C-C]/**  **X** | **X/X** |
|  |  |  |  |  |  |  |  |
| N | 48 | 97 | 25 | 22 | 148 | 41 | 129 |
| Sex (M/F) | 24/24 | 48/49 | 13/12 | 12/10 | 73/75 | 19/22 | 66/63 |
| Age (years) | 52±2.3 | 57±1.6 | 57±3.0 | 61±3.0 | 55±1.3 | 57±2.2 | 56±1.4 |
| BMI (kg/m²) | 28.5  (26.7-30.4) | 29.6  (28.3-31.0) | 29.4  (27.5-31.5) | 30.2  (27.6-33.1) | 29.1  (28.1-30.2) | 30.0  (27.8-32.3) | 29.0  (28.0-30.1) |
| Serum RBP4  (µg/ml) | 40.94  (35.04-47.83) | 45.05  (41.09-49.39) | 46.42  (35.91-60.00) | 47.78  (36.07-63.28) | 43.71  (40.46-47.21) | 47.57  (39.92-56.69) | 43.18  (39.71-46.96) |
| ***RBP4* mRNA Expression** | |  |  |  |  |  |  |
| Visceral fat (AU) | 1237  (535-2865) | 2543  (1599-4045) | 2213  (696-7040) | 3220  (946-10963) | 1899  (1264-2853) | 2633  (1175-5898) | 1873  (1204-2912) |
| Subcutaneous fat (AU) | 354  (153-818) | 612  (366-1023) | 902  (250-3259) | 982  (292-3302) | 508  (327-788) | 882  (318-2441) | 479  (308-745) |

| **Haplotype** | **[C-G-T-T-G-T]** | | **[C-G-T-C-G-C]** | |
| --- | --- | --- | --- | --- |
|  | **[C-G-T-T-G-T]/**  **X** | **X/X** | **[C-G-T-C-G-C]/**  **X** | **X/X** |
|  |  |  |  |  |
| N | 7 | 163 | 12 | 158 |
| Sex (M/F) | 4/3 | 81/82 | 6/6 | 79/79 |
| Age (years) | 57±6.4 | 56±1.2 | 54±4.2 | 56±1.2 |
| BMI (kg/m²) | 32.0  (29.5-34.8) | 29.1  (28.2-30.1) | 28.9  (26.0-32.1) | 29.3  (28.3-30.3) |
| Serum RBP4  (µg/ml) | 56.78  (39.53-81.57) | 43.72  (40.48-47.21) | 36.90  (25.59-53.20) | 44.76  (41.45-48.35) |
| ***RBP4* mRNA Expression** | |  |  |  |
| Visceral fat (AU) | 13954  (5613-34688) | 1872*  (1261-2778) | 2174  (429-11010) | 2023  (1356-3018) |
| Subcutaneous fat (AU) | 3887  (506-29869) | 509**  (335-773) | 567  (109-2956) | 552  (360-848) |

The data are presented as arithmetic means  S.E.M. for normal variables and geometric means (95% CI) for non-normally distributed variables (BMI, serum RBP4, visceral and subcutaneous *RBP4* mRNA). *P* values were calculated in additive mode of inheritance after adjusting for age, sex, BMI and % body fat. *P*-values <0.05 were considered to be of statistical significance. *) p = 0.04 (0.08 after adjusting for age, sex, % fat); **) p = 0.05 (0.1 after adjusting for age, sex, % fat). Due to the low frequency of the [A-G-G-T-G-C], [A-A-G-T-C-C], [C-G-T-T-G-T] and [C-G-T-C-G-C]haplotypes, for each haplotype the subjects with 2 copies were excluded from the analyses. X denotes any other haplotype.
